# Supplementary material for: Ethylene represses the promoting influence of cytokinin on cell division and expansion of cotyledons in etiolated Arabidopsis thaliana seedlings
Source: PeerJ. 2022 Oct 31;10:e14315. doi: 10.7717/peerj.14315 (PMC9632460; doi:10.7717/peerj.14315)
Supplement: Supplemental Information 1 [file peerj-10-14315-s001.xlsx]

## Sheet: Figure 2
Dry seed wt	Untreated wt	BA wt	4PU-30 wt	Ag+wt	BA + Ag+wt	Dry seed eti 5	Untreated eti 5	BA eti 5	4PU-30 eti 5
0.0801	0.0943	0.117	0.137	0.138	0.219	0.0839	0.16	0.238	0.309
0.0848	0.0926	0.12	0.139	0.104	0.221	0.0865	0.133	0.232	0.3
0.0804	0.0885	0.136	0.151	0.11	0.227	0.0894	0.144	0.249	0.302
0.0825	0.079	0.115	0.143	0.13	0.215	0.09	0.148	0.223	0.301
0.0898	0.0928	0.122	0.123	0.113	0.208	0.0882	0.143	0.241	0.297
0.0823	0.0987	0.115	0.135	0.129	0.213	0.0841	0.16	0.231	0.293
0.0835	0.0938	0.121	0.141	0.112	0.22	0.0869	0.144	0.241	0.297
0.0862	0.0984	0.113	0.14	0.119	0.222	0.0891	0.166	0.245	0.298
0.087	0.0865	0.121	0.136	0.115	0.242	0.0887	0.161	0.241	0.304
0.0853	0.0993	0.115	0.124	0.123	0.234	0.0805	0.161	0.229	0.297
0.0859	0.0861	0.115	0.148	0.114	0.239	0.0861	0.141	0.222	0.308
0.0915	0.106	0.118	0.118	0.137	0.226	0.0932	0.151	0.233	0.304
0.0804	0.0931	0.102	0.142	0.13	0.231	0.093	0.141	0.227	0.304
0.0884	0.0956	0.122	0.133	0.125	0.222	0.0869	0.152	0.238	0.301
0.0823	0.0937	0.131	0.143	0.104	0.224	0.0882	0.139	0.239	0.309
0.088	0.105	0.131	0.133	0.134	0.226	0.0873	0.163	0.245	0.306
0.0845	0.0993	0.11	0.131	0.122	0.197	0.0873	0.183	0.235	0.3
0.0848	0.0909	0.107	0.132	0.108	0.228	0.0816	0.161	0.241	0.298
0.0806	0.0904	0.0995	0.145	0.138	0.221	0.0892	0.162	0.23	0.303
0.0848	0.0946	0.115	0.138	0.124	0.223	0.0878	0.142	0.235	0.292

## Sheet: Figure 5 cluster area 5
Untreated wt	BA wt	4PU-30 wt	Ag+wt	BA + Ag+wt	Untreated eti 5	BA eti 5	4PU-30 eti 5
109.47	142.6	141.7	134.15	271.71	177.82	239.88	275.29
107.81	110.33	157.03	135.03	222.03	196.92	250.15	295.49
112.34	128.27	170.85	136.17	280.27	205.89	234.99	291.63
110.7	136.37	161.83	140.12	308.88	183.07	232.48	290.09
107.32	116.96	163.62	147.5	256.17	189.32	231.46	264.63
111.62	132.91	154.29	128.92	300.42	192.77	256.48	276.06
111.72	127.62	162.56	150.36	231	176.94	181.03	242.14
108.58	132.15	164.4	139.84	233.01	179.83	223.74	287.52
108.57	151.77	148.96	112.78	268.99	162.95	223.9	250.81
110.76	98.121	158.75	124.96	257.49	198.37	233.59	286.83
110.75	111.84	168.99	139.56	233.82	195.5	250.46	256.38
110.46	116.95	168.33	164.73	247.24	170.56	265.69	286.39
112.06	129.6	164.97	161.7	339.22	187.42	268.3	284.42
108.53	113.99	163.66	140.09	314.78	171.64	220.09	289.36
111.18	129.36	171.86	138.01	330.94	187	238.65	294.89
111.43	124.68	147.73	140.82	249.19	188.23	211.35	279.72
113.83	113.75	152.81	133.76	262.52	192.57	259.29	300.84
114.69	133.36	158.44	154.42	286.87	200.43	228.17	297.76
109.05	134.11	162.93	149.3	275.94	189.01	261.34	290.2
108.38	110.27	162.26	137.89	268.42	179.93	255.33	281.61
107.9	127.39	155.95	163.56	308.8	205.09	242.3	294.32
111.14	150.3	160.75	137.07	265.7	194.2	195.54	272.56
107.77	145.98	180.28	145.21	292.12	194.49	225.22	275.6
109.66	140.29	168.25	142.51	286.08	180.77	234.43	288.94
113.29	108.41	162.38	132.52	295.59	183.2	226.51	269.37
112.37	145.92	164.61	144.33	239.33	200	225.56	264.67
112.77	123	136.09	126.97	273.38	190.53	241.44	298.96
107.58	163.8	164.06	171.61	209.66	182.27	233.85	284.05
108.16	107.21	152.85	138.73	279.71	184.97	247.66	273.77
108.37	106.85	176.71	132.93	322.17	187.68	215.32	286.95
108.18	137.19	155.82	118.06	321.04	173.92	202.35	254.48
110.51	120.6	164.43	140.59	204.2	179.82	233.88	280.99
113.45	128.67	162.66	191.78	277.2	168.29	216.82	281.16
110.87	126.18	148.94	118.07	273.25	197.42	193.6	265.57
108.84	123.01	166.02	140.74	304.07	176.71	259.04	271.35
113.89	130.91	151.34	150.71	250.85	170.67	239.91	257.85
110.88	139.29	145.33	179.05	287.69	191.25	223.04	285.48
109.07	102.06	148.54	150.26	299.58	162.14	225	267.54
110.42	153.72	151.46	116.42	276.94	172.76	218.1	278.73
113.78	133.96	161.84	173.58	302.07	193.81	247.9	265.47
108.34	125.29	153.13	169.83	205.44	178.63	235.44	278.07
109.96	146.8	151.34	119.57	260.47	163.42	240.82	278.68
110.94	138.29	168.15	149.06	202.72	179.24	225.24	276.32
110.44	123.83	157.27	143.19	288.73	198.48	210.02	251.43
106.62	133.99	154.34	134.26	278.3	176.03	232.56	276.47
108.71	92.701	161.71	132.23	281.71	181.18	211.37	274.54
111.14	134.95	153.78	140.16	265.14	172.56	258.67	263.38
111.36	128	152.23	162.97	268.29	180.19	263.48	248.64
111.32	129.14	175.9	165.57	227.19	177.95	247.24	269.05
111.41	108.42	151.78	134.51	203.23	190.74	234.24	282.08
109.19	139.66	158.75	146.08	274.4	173.91	259.05	274.21
109.25	122.61	149.26	177.49	329.49	210.57	204.38	294.81
108.95	109.18	152.15	160.47	278.64	193.56	241.66	280.81
110.06	112.91	154.02	153.24	305.83	184.2	255.04	263.17
108.36	130.59	145.46	144.11	309.15	180.45	249.94	252.78
106.95	122.92	160.19	155.73	211.93	201.09	240.83	260.17
105.92	123.5	155.1	128.48	236.49	201.32	244.92	305.51
110.11	101.88	176.12	132.24	296.36	187.44	218.93	274.24
109.54	124.93	152.97	117.38	264.12	186.77	218.33	283.75
109.2	130.37	163.21	140.31	293.67	175.13	266.15	269.19
108.47	126.26	160.39	150.15	240.31	179.45	251.28	276.98
108.1	115.07	160.75	128.83	336.43	204.41	262.73	277.89
108.5	121.86	177.3	150.36	268.63	164.46	240.86	297.03
108.77	141.68	139.12	148.28	248.56	171.44	222.66	274.79
108.26	120.08	156.23	153.94	250.37	171.14	237.22	258.05
115.73	120.54	151.2	162.44	261.91	183.14	226.39	268.41
109.95	122.29	157.71	123.92	310.87	220.1	218.11	299.57
110.43	122.34	144.95	160.55	265.75	179.44	188.63	271.81
109.63	123.41	143.63	113.27	326.15	186.86	214.02	289.76
109.96	127.64	153.12	126.31	274.35	177.94	229.66	300.1
110.55	139.08	149.24	119.64	327.1	175.08	239.96	285.28
111.5	131.58	147.66	156.82	253.41	204.18	240.09	275.04
110.14	108	145.99	153.49	243.3	178.23	268.15	261.83
108.52	136.77	169.89	152.86	280.66	194.11	246.44	289.22
110.71	110.02	171.44	170.28	332.13	175.68	235.59	260.42
108.72	133.7	165.1	160.19	306.59	172.2	243.49	294.2
110.03	122.56	163.46	145.21	251.95	189.67	239.99	252.78
112.23	120.29	169.62	145.82	303.84	154.01	245.54	266.91
109.63	122.74	158.48	183.55	273.48	197.07	268.84	292.54
110.95	137.09	142.94	124.34	304.22	181.36	232.89	293.88
110.58	111.84	151.19	173.71	218.89	176.92	232.39	280.88
110.36	104.82	151.18	187.92	271.85	167.03	234.98	263.56
109.7	158.15	168.13	138.28	212.72	195.11	203.68	288.09
110.5	131.26	170.7	152.06	308.3	221.57	214.25	310.07
112.67	123.9	175.76	136.62	258.51	171.23	222.83	255.55
108.78	104.88	155.36	146.82	301.72	182.61	241.01	273.42
110.74	121.41	167.95	164.69	322.07	202.85	251.89	281.75
111.19	128.69	153.53	128.03	300.7	188.68	238.13	297.7
110.58	131.75	161.46	145.25	280.49	190.73	239.61	273.71
108.61	124.54	155.8	140.78	272.74	183.77	260.29	265.97
113.65	118.3	156.67	174	269.74	165.47	245.87	267.56
111.02	100.39	172.76	160.22	285.21	191.72	230.87	272.66
108.45	139.61	179.94	163	259.36	195.53	233.32	292.59
110.84	106.87	144.69	160.44	278.02	193.62	230.33	295.91
110.5	114.74	180.81	137.92	293.16	197.04	242.8	280.9
105.55	97.21	163.27	154.9	215.36	164.94	234.02	255.85
111.69	120.84	175.12	172.56	298.92	192.55	245.2	266.1
111.02	105.03	168.51	140.5	297.99	180.32	217.32	264.4
113.28	115.46	162.69	151.19	228.42	186.93	254.62	248.43
107.27	139.86	154.7	148.47	328.45	167.76	240.35	282.86
106.98	127.08	162.33	153.85	282.59	202.93	224.41	261.81
110.19	151.72	162.64	137.39	278.39	198.79	195.75	266.9
110.42	146.13	160.91	144.93	239.77	193.11	220.26	297.54
109.81	133.42	152.41	169.74	287.07	175.14	234.17	260.24
109.92	110.8	156.3	146.68	269.44	189.48	245.76	294.31
110.38	140.36	160.98	122.16	232.32	201.97	216.09	288.73
107.18	145.77	161.45	177.39	267.94	185.84	236.09	302.41
110.72	140.66	166.35	147.24	264.58	192.68	238.72	282.52
105.78	155.94	158.57	139.76	305.59	202.93	233.58	272.29
110.5	138.88	154.27	168.7	270.31	171.8	276.91	252.49
109.44	117.27	167.44	145.17	273.66	165.21	236.01	278.99
110.44	107.92	167.73	132.09	226.21	185.95	221.86	279.05
108.44	92.771	154.05	156.02	303.92	182.4	212.57	317.9
108.18	127.45	150.19	137.45	281.95	171.34	213.01	278.25
110.29	130.32	170.42	142.02	322.61	171.55	243.23	277.75
113.92	123.12	152.59	113.39	282.37	195.03	237.68	284.94
109.07	105.49	164.02	135.86	279.38	182.7	245.9	282.64
111.39	128.75	141.74	139.49	279.36	183.72	255.36	284.65
108.47	145.37	165.34	127.47	244.36	199.19	228.34	277.92
110.66	128.66	153.43	136.97	305.68	184.75	247.13	289.54

## Sheet: Figure 5 % cell division
Untreated wt	BA wt	4PU-30 wt	Ag+wt	BA + Ag+wt	Untreated eti 5	BA eti 5	4PU-30 eti 5
38.487	39.658	51.709	37.825	61.003	28.027	39.73	82.304
37.469	47.395	51.19	39.564	53.67	32.965	40.871	85.379
29.275	45.732	54.471	48.77	77.671	27.706	35.725	77.149
42.81	32.986	50.911	49.116	63.411	35.117	39.961	76.562
38.45	41.673	51.722	50.233	67.358	28.618	38.786	73.372
33.098	45.493	51.663	36.617	83.374	33.047	37.631	86.487
30.946	44.413	50.921	33.981	70.479	30.072	40.638	82.352
33.687	38.793	55.436	38.895	65.807	23.048	41.083	76.426
25.26	45.298	54.835	43.751	67.381	33.881	41.058	84.202
31.83	45.781	51.187	46.112	68.361	35.55	38.345	82.352
36.033	43.916	59.678	40.116	74.817	29.537	37.028	78.946
39.78	44.358	54.921	46.645	70.449	35.192	40.531	89.084
32.758	48.121	56.029	35.397	76.31	35.117	44.402	85.274
34.132	42.687	49.285	40.685	70.723	25.969	35.123	76.2
37.405	40.485	52.542	41.638	70.099	32.225	39.144	78.941
34.14	44.052	53.166	40.314	73.738	37.032	37.881	82.581
33.994	44.829	54.475	36.321	56.924	34.791	34.772	81.63
41.623	42.064	53.029	38.601	72.214	30.264	41.831	80.835
35.44	43.89	53.888	39.56	74.837	29.442	35.904	82.174
37.649	36.421	53.901	38.418	62.886	40.974	37.277	81.466
38.022	42.605	51.04	39.311	63.022	30.909	32.62	79.443
29.447	42.118	52.708	42.273	78.681	30.746	42.401	83.154
34.846	49.393	52.44	38.342	70.942	30.742	37.824	83.035
35.489	47.721	51.739	44.909	73.025	28.025	33.341	81.019
37.567	42.033	52.717	36.612	62.933	28.345	37.837	89.485
40.98	42.676	49.597	38.715	65.143	30.113	39.499	79.213
42.517	43.695	50.217	41.541	71.348	35.525	34.954	77.996
38.268	51.524	52.349	41.57	70.094	31.697	43.726	85.349
42.072	37.871	49.589	42.479	65.258	34.365	38.935	80.058
37.184	41.509	49.297	32.936	63.914	30.607	42.067	72.892
31.182	38.486	55.047	46.004	70.821	32.216	35.933	81.023
34.404	43.968	54.497	41.714	61.398	32.255	34.157	82.192
36.308	33.854	51.106	40.18	57.909	31.582	34.174	82.508
37.153	42.942	51.168	44.433	62.211	33.516	37.717	83.432
39.373	35.541	51.426	34.311	47.221	31.007	40.601	80.054
38.286	36.665	52.685	39.635	64.807	36.679	38.761	78.855
35.121	53.75	54.379	46.302	51.153	30.424	35.974	81.386
35.449	38.598	52.32	38.129	62.589	35.001	39.382	80.167
33.009	44.885	49.149	35.913	64.806	33.823	37.311	81.621
40.188	40.7	56	45.334	66.575	33.123	34.346	78.342
40.646	45.213	50.305	49.938	63.484	30.968	36.13	80.338
31.339	40.533	50.933	32.55	76.72	36.083	42.702	80.372
33.811	39.786	55.616	40.339	59.115	34.944	38.475	78.949
34.644	38.626	51.078	41.289	67.69	35.005	40.048	79.411
35.576	41.672	55.211	49.053	61.763	28.692	40.957	81.226
41.08	40.518	53.417	45.235	51.814	35.961	35.16	83.672
38.567	45.333	52.025	43.09	55.254	36.123	41.283	80.474
36.36	42.081	54.009	39.819	71.94	36.304	39.491	79.766
37.562	44.484	57.637	41.238	72.332	35.462	39.537	82.689
37.338	37.989	54.65	42.347	60.212	31.4	40.281	78.545
33.991	45.297	54.285	40.939	55.447	30.907	37.282	74.831
40.707	42.345	52.849	32.425	56.847	31.7	38.106	87.011
34.819	47.243	54.749	42.334	66.196	31.155	39.166	82.241
30.452	37.722	55.841	45.096	71.79	37.428	37.166	83.288
39.619	40.756	51.908	48.477	71.772	33.285	38.446	84.878
31.553	39.878	53.938	45.227	53.92	29.771	38.332	88.153
35.23	36.082	52.557	43.945	55.185	31.515	38.455	79.356
36.269	41.997	54.024	34.122	57.156	28.178	34.5	85.811
33.823	43.248	54.067	42.022	56.237	33.306	37.015	73.194
31.34	34.334	53.872	42.787	54.895	43.539	36.714	84.682
37.836	43.584	53.31	30.593	67.316	30.559	41.211	81.385
34.939	37.584	54.471	42.79	72.474	33.142	41.138	84.208
28.967	39.102	51.734	42.895	52.366	30.117	38.195	82.754
34.507	37.613	54.337	46.728	66.494	33.097	36.109	85.656
36.006	40.492	56.603	37.349	81.36	33.974	35.588	77.368
32.311	41.671	54.076	43.178	58.057	36.79	37.008	78.872
34.275	44.988	52.09	42.5	62.175	26.011	34.762	79.112
40.979	38.469	52.919	40.703	60.772	32.435	34.905	74.638
34.591	42.183	57.118	41.946	63.215	29.984	33.727	88.754
39.031	37.26	51.646	37.391	64.909	32.333	35.974	77.082
27.67	46.413	54.669	44.983	65.054	29.9	38.588	82.963
35.571	42.569	53.042	25.822	73.594	33.004	33.548	87.472
32.975	36.508	49.165	42.834	57.586	24.123	35.926	77.102
35.069	41.088	54.786	36.545	66.465	34.877	37.937	84.591
37.969	46.512	49.341	46.877	52.78	34.62	37.77	83.229
36.662	42.44	52.627	43.519	69.708	30.64	35.19	79.875
32.9	40.614	53.494	36.967	63.096	32.497	38.1	83.88
40.687	44.516	49.466	40.037	58.654	31.036	34.259	78.691
29.773	40.464	54.503	43.618	73.003	33.835	38.959	82.499
36.731	48.571	54.132	42.206	67.3	33.439	37.87	78.455
38.215	38.556	55.257	40.935	68.109	27.023	36.3	89.917
35.367	37.502	58.046	46.479	50.466	27.418	40.505	80.27
42.327	44.635	55.823	34.675	58.008	24.055	38.128	87.259
38.491	34.395	52.032	46.625	77.355	34.529	44.178	83.757
40.647	43.438	51.122	40.857	66.341	31.655	39.102	84.566
39.418	39.532	54.224	37.271	65.045	32.802	42.795	90.975
36.456	49.698	52.63	41.01	64.287	35.874	39.389	79.573
40.796	41.718	50.31	48.235	68.139	27.777	38.483	80.129
29.312	39.719	49.56	35.041	55.278	32.829	32.515	79.94
34.358	40.874	50.67	32.72	66.821	29.222	39.889	82.811
37.71	40.688	53.999	40.947	81.276	35.852	37.558	82.105
37.899	37.651	51.69	40.98	70.515	30.692	38.621	83.786
37.629	34.083	49.893	44.217	67.218	34.294	42.374	81.479
32.448	43.511	51.988	36.891	57.324	33.936	35.851	81.564
33.247	44.039	51.443	37.36	56.446	32.907	36.774	83.171
33.902	37.327	52.101	42.218	51.658	30.07	45.798	83.224
34.917	40.782	53.686	36.318	64.558	29.373	40.954	82.419
36.397	46.463	53.128	39.74	65.125	33.069	40.005	81.475
34.838	39.105	53.737	38.594	55.261	30.705	37.016	87.661
37.33	36.237	52.086	40.146	64.642	31.093	36.946	78.815
33.095	50.877	55.7	45.513	58.013	32.9	36.911	85.308
37.211	41.042	54.258	43.746	72.448	33.911	39.028	86.679
38.94	41.732	51.714	38.243	74.761	39.271	38.789	77.671
32.675	42.555	54.823	39.817	72.587	31.442	35.632	82.48
42.823	41.448	52.14	42.49	47.827	35.259	40.694	87.961
33.008	44.235	50.816	38.056	62.39	34.838	34.522	84.642
32.411	36.417	53.866	47.549	61.892	34.747	41.266	82.439
34.646	40.653	50.952	41.065	63.663	28.039	37.79	70.318
34.962	38.413	52.892	45.277	63.465	25.976	36.337	82.382
32.755	42.461	50.185	46.427	72.299	33.572	38.706	82.321
41.582	46.583	51.598	42.891	69.108	31.496	38.634	84.045
38.563	44.859	53.21	37.74	65.207	30.625	36.188	77.469
35.805	39.209	54.441	34.504	57.462	30.896	38.158	75.541
37.029	37.365	54.599	42.148	73.411	32.104	38.563	85.659
39.57	45.45	52.808	39.997	75.932	32.952	39.022	82.994
34.318	42.531	52.489	40.847	70.398	33.301	42.036	85.324
34.596	41.088	50.619	45.261	56.21	29.323	40.929	76.029
37.034	39.5	53.505	40.42	67.791	27.883	41.191	83.673
37.427	40.833	51.843	36.398	55.199	30.744	35.393	85.164
37.263	38.755	52.442	40.687	49.022	36.379	39.253	77.663

## Sheet: Figure 6 cluster area
Untreated wt	BA wt	4PU-30 wt	Ag+wt	BA + Ag+wt	Untreated eti 5	BA eti 5	4PU-30 eti 5
176.69	229.24	250.28	266.39	593.93	229.17	221.09	345.84
193.39	196.05	241.82	217.84	528.5	237.89	226.3	405.72
181.21	172.25	257.99	282.45	376.16	235.88	235.44	400.51
174.52	194.21	266.76	238.53	517.15	209.71	216.79	390.56
200.72	210.09	209.12	267.17	578.98	222.02	174.35	392.26
184.94	207.28	244.74	263.4	560.33	231.2	224.52	411.61
184.43	150.58	269.02	230.52	448.14	251.79	217.88	374.96
169.16	174.02	265.92	250.07	397.02	227.71	248.74	396.56
183.4	202.53	251.07	255.59	515.27	233.22	203.99	397.84
183.32	226.33	264.31	294.91	468.44	228.78	223.03	463.86
201.3	213.78	282.89	277.86	489.86	213.74	245.48	357.5
198.42	264.13	279.85	233.85	448.73	221.89	175.41	368.52
183.19	193.09	271.93	286.29	559.63	230.81	241.56	382.84
189.25	176.36	254.84	241.93	522.51	222.35	250.98	403.65
183.87	248.47	250.87	242.34	514.04	234.15	287.22	360.18
171.9	209.4	275.41	245.9	523.95	221.19	216.58	334.39
191.01	212.11	280.69	228.94	433.32	229.65	220.77	363.65
169.77	249.88	272.58	276.03	498.84	228.16	199.19	425.08
178.9	165.94	250.09	240.83	566.57	218.16	235.27	443.04
199.53	206.42	252.69	262.62	438.46	219.23	222.11	361.68
173.88	192.84	305.65	233.87	469.09	245.63	216.63	419.19
182.49	229.6	288.11	235.29	533.61	223.33	234.98	395.27
186.61	241.6	263.19	266.97	450.17	231.06	208.84	398.03
164.1	211.53	250.45	316.95	531.11	239.36	201.39	423.44
163.07	255.93	257.33	282.53	586.95	232.55	238.84	362.36
187.27	181.19	238.66	272.41	553.41	225.33	244.21	265.41
184.54	259.21	263.01	296.19	473.54	224.66	274.79	429.48
178.08	187.74	270.48	234.83	511.07	227.48	244.92	424.14
186.34	199.97	231.48	271.06	410.27	232.42	201.38	357.38
185.99	190	232.6	250.5	454.88	226.13	223.88	364.98
170.73	227.12	232.71	268.29	555.53	228.44	192.7	397.73
191.03	218.53	258.93	309.14	420.69	236.1	231.74	423.99
175.02	238.16	255.32	244.29	472.12	249.65	239.64	350.86
178.74	259.71	250.33	283.23	505.49	231.65	224.57	391.63
189.35	191.61	238.43	285.27	455.65	232.9	243.57	376.73
190.93	199.25	282.51	259.56	433.12	227.31	245.22	350.42
186.75	238.25	271.78	285.5	553.09	238.2	216.58	383.36
169.61	165.74	248.77	263.23	494.46	218.26	231.56	391.1
198.96	235.38	277.99	271.3	446.7	215.6	220.79	369.14
187.08	241.33	251.16	315.32	528.03	212.99	234.55	417.03
181.31	200.93	268.84	293.44	403.75	232.58	259.63	397.05
179.61	196.2	269.61	290.68	507.06	241.63	207.41	362.21
170.15	234.97	213.08	203.03	495.34	215.52	242.95	423.61
173.18	170.53	256.1	245.73	455.08	230.43	257.29	448.03
174.24	285.51	253.84	278.36	455.69	232.13	258.11	365.18
174.59	152.77	248.39	256.46	424.41	240.99	236.86	317.74
180.97	270.72	258.47	259.4	501.51	227.65	264.15	422.87
172.02	199.47	254.99	297.49	481.48	233.47	190.62	412.97
188.42	231.69	198.15	254.89	378.58	221.19	243.27	398.09
166.85	186.79	249.25	302.17	476.25	211.57	191.44	363.14
194.51	235.55	262.21	296.77	479.74	223.33	217.65	311.57
171.64	199.06	272.6	259.59	543.81	212.59	180.04	320.24
179.35	240.74	250.18	224.78	497.1	221.03	246.98	355.02
174.72	178.26	248.6	191.01	479.83	219.86	233.74	404.66
185.84	215.23	244.28	258.83	549.37	233.02	260.39	388.98
183.38	242.33	270.27	286.65	511.61	246.47	311.06	400.09
189.92	226.31	256.68	289.23	512.66	235.27	210.1	410.47
175.84	193.76	246.77	314.25	587.9	238.54	208.19	363.35
194.35	248.72	257.83	235.65	413.8	232	249.34	394.34
181.22	206.29	268.04	276.14	489.84	240.67	206.33	428.03
187.62	216.86	274.21	291.55	421.87	241.77	253.59	329.24
185.65	263.55	304.97	286.84	398	229.64	237.37	381.18
192.32	199.31	318.64	250.17	488.97	228.87	216.64	381.61
195.81	185.87	218.29	283.63	481.99	230.3	262.71	361.41
184.13	244.07	244.59	323.04	466.11	232.29	286.64	419.62
195.59	147.74	246.9	255.06	319.78	225.65	189.29	380.88
174.96	134.87	271.52	282.5	475.19	221.04	216.88	421.9
195.97	282.73	263.19	285.97	487.89	229.91	240.41	418.54
181.77	205.36	266.08	230.51	504.24	230.59	263.59	366.35
172.89	231.52	246.78	282.85	508.11	219.07	251.54	346.64
196.68	270.41	260.08	261.6	481.56	213.44	201.18	383.58
155.46	285.9	242.75	249.25	554.33	226.66	233.94	379.16
174.14	219.55	259.29	205.54	479.65	211.72	216.73	420.27
163.48	264.77	289.32	270.01	478.39	245.32	270.64	316.87
191.72	247.59	250.83	258.09	452.43	233.77	175.45	307.18
178.92	245.05	269.29	309.28	445.08	230.82	236.01	352.31
181.31	196.58	266.7	252.16	557.25	237.08	226.12	384.33
173.59	257.99	243.96	277.41	463.75	227.86	210.29	418.03
175.26	222.24	229.6	251.1	434.38	237.15	254.29	402.58
184.09	242.54	266.92	257.58	481.91	226.85	238.4	371.57
182.58	269.68	253.52	219.65	503.4	220.49	227.88	359.48
187.37	165.39	266.39	270.44	402.95	235.79	231.97	362.18
180.73	197.44	263.31	261.81	438.4	233.82	199.24	390.7
183.82	253.71	293.88	223.41	495.54	228.96	217.5	332.82
186.13	215.25	240.02	263.65	571.18	226.31	209.24	378.42
192.04	213.1	253.5	224.33	489.87	226.95	252.64	397.88
177.83	182.04	279.96	290.1	406.66	221.41	233.15	385.74
200.58	216.77	257.26	268.99	505.01	218.88	174.39	311.76
189.33	199.13	258.52	328.79	463.3	223.07	230.15	342.6
183.56	192.33	238.73	284.26	563.58	221.54	221.34	345.68
178.06	163.43	253.45	332.57	551.41	237.5	250.75	411.78
186.92	263.61	247.46	265.53	448.99	231.74	177.37	355.39
185.88	222.27	241.1	287.07	502.92	220.64	224.3	402.37
161.95	200	244.52	324.87	505.63	241.49	221.38	409.75
201.17	242.72	228.56	288.34	469.81	241.67	228.8	371.54
176.16	187.53	277.87	214.61	514.07	235.72	210.81	440.58
187.05	237.27	246.18	223.64	525.23	231.35	208.7	450.68
188.44	152.88	285.38	270	459.72	247.47	263.72	425.13
188.12	239.98	255.97	282.11	580.52	213.55	230.71	325.89
189.51	240.59	281.37	258.65	436.37	233.85	207.39	366.02
182.13	207	240.71	251.29	507.73	216.19	196.01	349.87
193.46	241.21	227.29	255.05	528.36	233.19	221.39	391.22
172.83	197.45	225.65	247.13	445.25	229.76	235.73	353.29
183.83	237.76	248.29	227.19	417.58	224.17	233.8	396.11
181.31	188.42	250.61	226.97	450.58	210.96	250.45	361.28
166.35	247.21	233.65	256.07	590.44	228.91	249.78	339.29
169.84	231.18	253.74	208.19	485.65	234.16	229.1	327.48
183.68	224.1	274.18	284.22	478.47	216.85	240.46	378.53
176.99	231.37	253.7	296.65	437.82	227.25	238.43	436.07
190.65	212.4	231.94	291.67	375.89	226.16	236.96	394.55
194.47	299.47	238.22	277	444.79	228.55	211.65	398.61
196.78	241.5	264.56	208.43	455.34	237.66	196.5	423.69
184.91	249.52	269.72	321.59	396.77	215.88	219.34	341.03
191.42	215.41	279.69	257.6	583.66	225.08	236.53	414.25
185.69	160.05	266.97	228.47	464.5	212.74	228.36	382.28
184.62	236.49	252.49	217.98	436.63	225.91	224.85	357.23
188.28	226.26	222.51	244.09	465.45	253.03	251.99	386
169.86	210.14	228.73	245.3	471.04	228.09	251.91	423.06
184.02	237.76	268.96	244.17	519.8	224.26	235.98	420.06
179.87	211.27	261.86	232.49	411.33	233.83	239.14	385.28

## Sheet: Figure 6 % cell division
Untreated wt	BA wt	4PU-30 wt	Ag+wt	BA + Ag+wt	Untreated eti 5	BA eti 5	4PU-30 eti 5
29.289	42.033	49.607	29.271	57.766	39.578	39.578	73.547
19.413	40.533	52.356	28.186	51.184	37.357	37.357	67.5
29.014	38.573	50.493	29.057	57.549	46.55	46.55	67.922
24.443	31.716	56.496	29.212	57.513	39.738	39.738	76.604
20.456	47.542	54.28	29.928	54.109	37.491	37.491	80.086
37.8	33.087	49.478	29.678	55.079	38.82	38.82	66.311
17.139	39.124	48.419	28.732	55.594	35.568	35.568	65.821
27.455	44.667	51.616	27.985	57.252	24.84	24.84	71.713
25.945	38.345	49.323	28.435	61.519	32.081	32.081	56.053
28.163	43.163	46.134	30.777	58.28	52.806	52.806	66.37
24.028	37.071	54.11	32.846	54.659	40.226	40.226	72.74
31.033	42.473	50.05	23.973	56.938	52.055	52.055	76.875
33.626	36.601	52.914	27.914	56.051	34.363	34.363	77.434
33.136	38.317	51.47	25.712	53.97	39.869	39.869	70.354
30.319	30.424	46.233	28.173	57.482	43.524	43.524	74.592
43.226	33.564	47.44	28.241	56.412	38.656	38.656	75.254
16.448	31.032	54.721	30.082	54.017	48.589	48.589	54.512
26.581	32.697	55.912	31.803	51.949	24.177	24.177	71.267
28.741	41.851	46.26	29.072	53.899	26.053	26.053	78.763
19.864	34.175	48.568	29.372	54.36	34.104	34.104	53.72
21.688	41.229	55.82	33.019	55.068	34.699	34.699	61.792
32.699	26.383	47.992	27.019	52.73	32.531	32.531	83.24
29.6	34.446	47.403	28.555	56.828	36.537	36.537	48.448
17.825	29.725	49.884	26.252	57.533	41.388	41.388	85.011
29.132	36.583	48.021	26.54	57.415	43.637	43.637	64.531
31.838	31.434	51.387	23.974	56.443	42.29	42.29	65.551
25.334	25.752	51.803	30.632	55.978	45.749	45.749	67.174
27.494	36.122	53.431	27.937	54.546	28.04	28.04	68.898
37.262	35.939	53.262	28.134	53.912	38.781	38.781	76.944
31.976	39.156	49.218	29.755	57.248	47.501	47.501	76.513
28.43	36.495	54.541	33.382	52.173	31.054	31.054	75.912
35.803	31.697	47.517	27.499	55.55	38.565	38.565	64.931
22.608	32.239	57.127	30.753	55.888	45.853	45.853	68.163
16.537	34.51	45.203	30.519	59.956	25.367	25.367	76.17
18.849	36.739	52.548	28.067	52.807	40.344	40.344	72.137
24.673	36.247	45.091	26.639	53.551	27.795	27.795	78.391
28.11	31.414	53.637	29.341	61.825	43.45	43.45	66.703
23.615	35.499	57.098	28.145	58.149	23.028	23.028	77.617
35.778	38.648	51.329	27.537	56.243	42.8	42.8	86.206
21.02	34.252	58.662	26.838	60.484	29.719	29.719	75.405
15.983	39.83	57.423	28.795	52.834	31.221	31.221	64.526
28.778	44.235	51.653	26.529	52.022	46.529	46.529	76.079
29.366	35.827	52.688	27.073	54.048	31.49	31.49	80.781
30.81	39.247	51.437	25.739	57.158	46.523	46.523	64.382
19.929	40.284	37.633	28.687	57.074	31.179	31.179	75.596
34.562	37.481	56.778	26.14	56.452	44.526	44.526	78.142
34.366	42.919	55.143	28.395	50.981	40.601	40.601	71.619
29.139	35.276	49.743	28.636	60.758	33.784	33.784	59.499
26.043	38.586	49.14	28.073	53.727	33.45	33.45	65.921
39.697	34.174	59.46	28.965	52.111	36.136	36.136	64.803
37.474	37.836	51.281	27.744	52.88	40.009	40.009	75.316
27.85	40.477	51.269	28.578	57.932	43.91	43.91	75.3
25.351	34.602	53.599	29.672	52.127	25.215	25.215	65.509
27.74	34.118	53.801	31.86	56.768	41.451	41.451	70.584
29.716	33.448	48.616	26.509	54.744	50.261	50.261	64.461
22.754	35.099	53.183	29.696	58.875	46.656	46.656	77.257
26.961	37.015	46.48	30.999	61.744	32.05	32.05	72.469
18.492	39.231	56.646	31.597	54.931	48.517	48.517	67.221
37.464	34.174	47.186	30.307	54.365	33.603	33.603	67.893
30.566	39.135	54.04	28.477	54.54	33.402	33.402	72.922
30.973	33.322	49.482	28.222	52.141	41.278	41.278	81.409
31.41	33.798	52.633	26.938	52.406	43.32	43.32	77.366
33.886	35.475	53.423	27.979	52.902	42.018	42.018	78.196
17.774	39.809	43.809	28.521	56.489	37.839	37.839	58.903
30.433	35.803	48.257	30.179	54.111	37.741	37.741	74.308
25.071	37.885	53.786	29.113	52.068	32.881	32.881	73.768
25.988	35.413	53.128	27.234	55.399	41.729	41.729	72.298
24.556	34.601	44.381	26.908	53.965	31.494	31.494	72.781
25.568	38.493	50.362	29.775	52.18	41.939	41.939	69.2
41.617	29.009	44.726	25.34	55.696	36.093	36.093	75.468
38.434	36.253	53.775	30.815	57.739	32.509	32.509	68.635
37.956	31.8	59.08	29.296	60.13	31.792	31.792	65.496
31.133	42.204	61.116	30.257	56.158	32.388	32.388	64.644
35.578	39.68	52.759	27.719	53.91	33.898	33.898	64.308
32.716	39.91	50.643	26.195	58.705	30.795	30.795	69.982
33.155	39.853	48.303	25.829	56.221	31.935	31.935	77.502
11.962	38.611	54.381	26.166	60.625	30.363	30.363	80.599
34.129	42.196	53.021	32.875	57.92	46.474	46.474	76.793
31.024	33.055	49.459	31.551	53.727	37.857	37.857	69.786
31.363	41.086	48.826	31.313	57.054	38.438	38.438	67.444
18.595	42.926	48.177	29.435	52.644	42.913	42.913	73.908
29.823	35.507	51.622	25.287	54.424	30.878	30.878	60.058
30.773	36.677	53.619	28.629	56.64	35.035	35.035	71.743
26.132	34.976	51.612	30.41	56.65	38.067	38.067	66.487
19.079	34.77	50.982	25.933	53.648	39.291	39.291	52.544
20.625	31.239	49.436	28.097	58.621	41.436	41.436	69.552
25.037	29.228	53.867	29.983	52.97	41.675	41.675	73.851
18.344	36.664	54.164	29.211	54.614	46.822	46.822	62.925
22.88	35.155	50.368	31.82	53.252	47.659	47.659	65.565
23.361	35.813	43.82	29.942	56.555	34.061	34.061	73.172
28.698	38.343	52.009	29.641	60.72	47.009	47.009	73.004
31.695	45.086	51.469	25.53	53.58	38.176	38.176	72.366
30.853	33.963	52.32	30.685	53.049	29.301	29.301	70.317
28.864	39.784	52.689	31.463	53.284	31.893	31.893	61.734
29.214	34.749	49.605	28.37	53.987	37.688	37.688	68.88
30.503	38.295	49.871	28.019	61.683	44.594	44.594	78.326
14.018	35.639	47.446	26.338	58.162	37.966	37.966	81.731
21.909	33.048	56.165	33.652	56.088	49.156	49.156	69.925
24.218	36.024	57.54	26.549	54.054	41.639	41.639	67.763
45.285	39.227	49.282	31.402	57.578	45.747	45.747	81.627
40.664	40.054	56.895	29.919	54.286	40.754	40.754	77.465
26.452	38.814	54.291	30.954	54.334	31.352	31.352	73.63
33.858	36.009	54.78	26.986	53.485	37.097	37.097	70.551
35.938	33.333	55.522	26.141	54.369	36.83	36.83	80.035
35.333	38.204	54.624	31.073	49.328	27.312	27.312	79.572
30.869	33.833	50.992	29.148	54.964	41.505	41.505	75.382
32.892	36.737	44.319	26.401	53.059	30.985	30.985	76.456
26.208	39.725	53.68	29.372	52.436	37.463	37.463	71.485
30.412	36.166	47.634	28.075	53.365	43.592	43.592	67.154
36.843	30.349	50.108	26.088	60.86	26.362	26.362	72.727
23.006	35.237	46.489	27.999	56.444	26.156	26.156	58.322
30.706	37.572	48.495	28.896	55.254	26.039	26.039	77.114
27.861	38.963	53.809	27.12	55.263	38.132	38.132	78.767
23.52	45.023	48.935	30.061	54.447	30.972	30.972	72.25
22.595	42.171	53.878	28.705	55.992	38.117	38.117	70.895
26.466	33.977	58.218	28.297	52.68	36.542	36.542	79.245
30.018	36.79	53.363	31.564	58.63	26.78	26.78	71.31
28.345	33.235	57.468	26.996	58.752	38.657	38.657	72.766
31.435	42.481	58.857	27.62	55.392	43.409	43.409	76.365
28.217	37.713	49.136	28.828	53.594	32.788	32.788	71.144
